# Supplementary figures and images for: Bioinspired inorganic nanoparticles and vascular factor microenvironment directed neo-bone formation
Source: Royal Society of Chemistry journal article supplement (doi:10.1039/d0bm00041h), 2020-01-01

## Supplementary Figure 1.

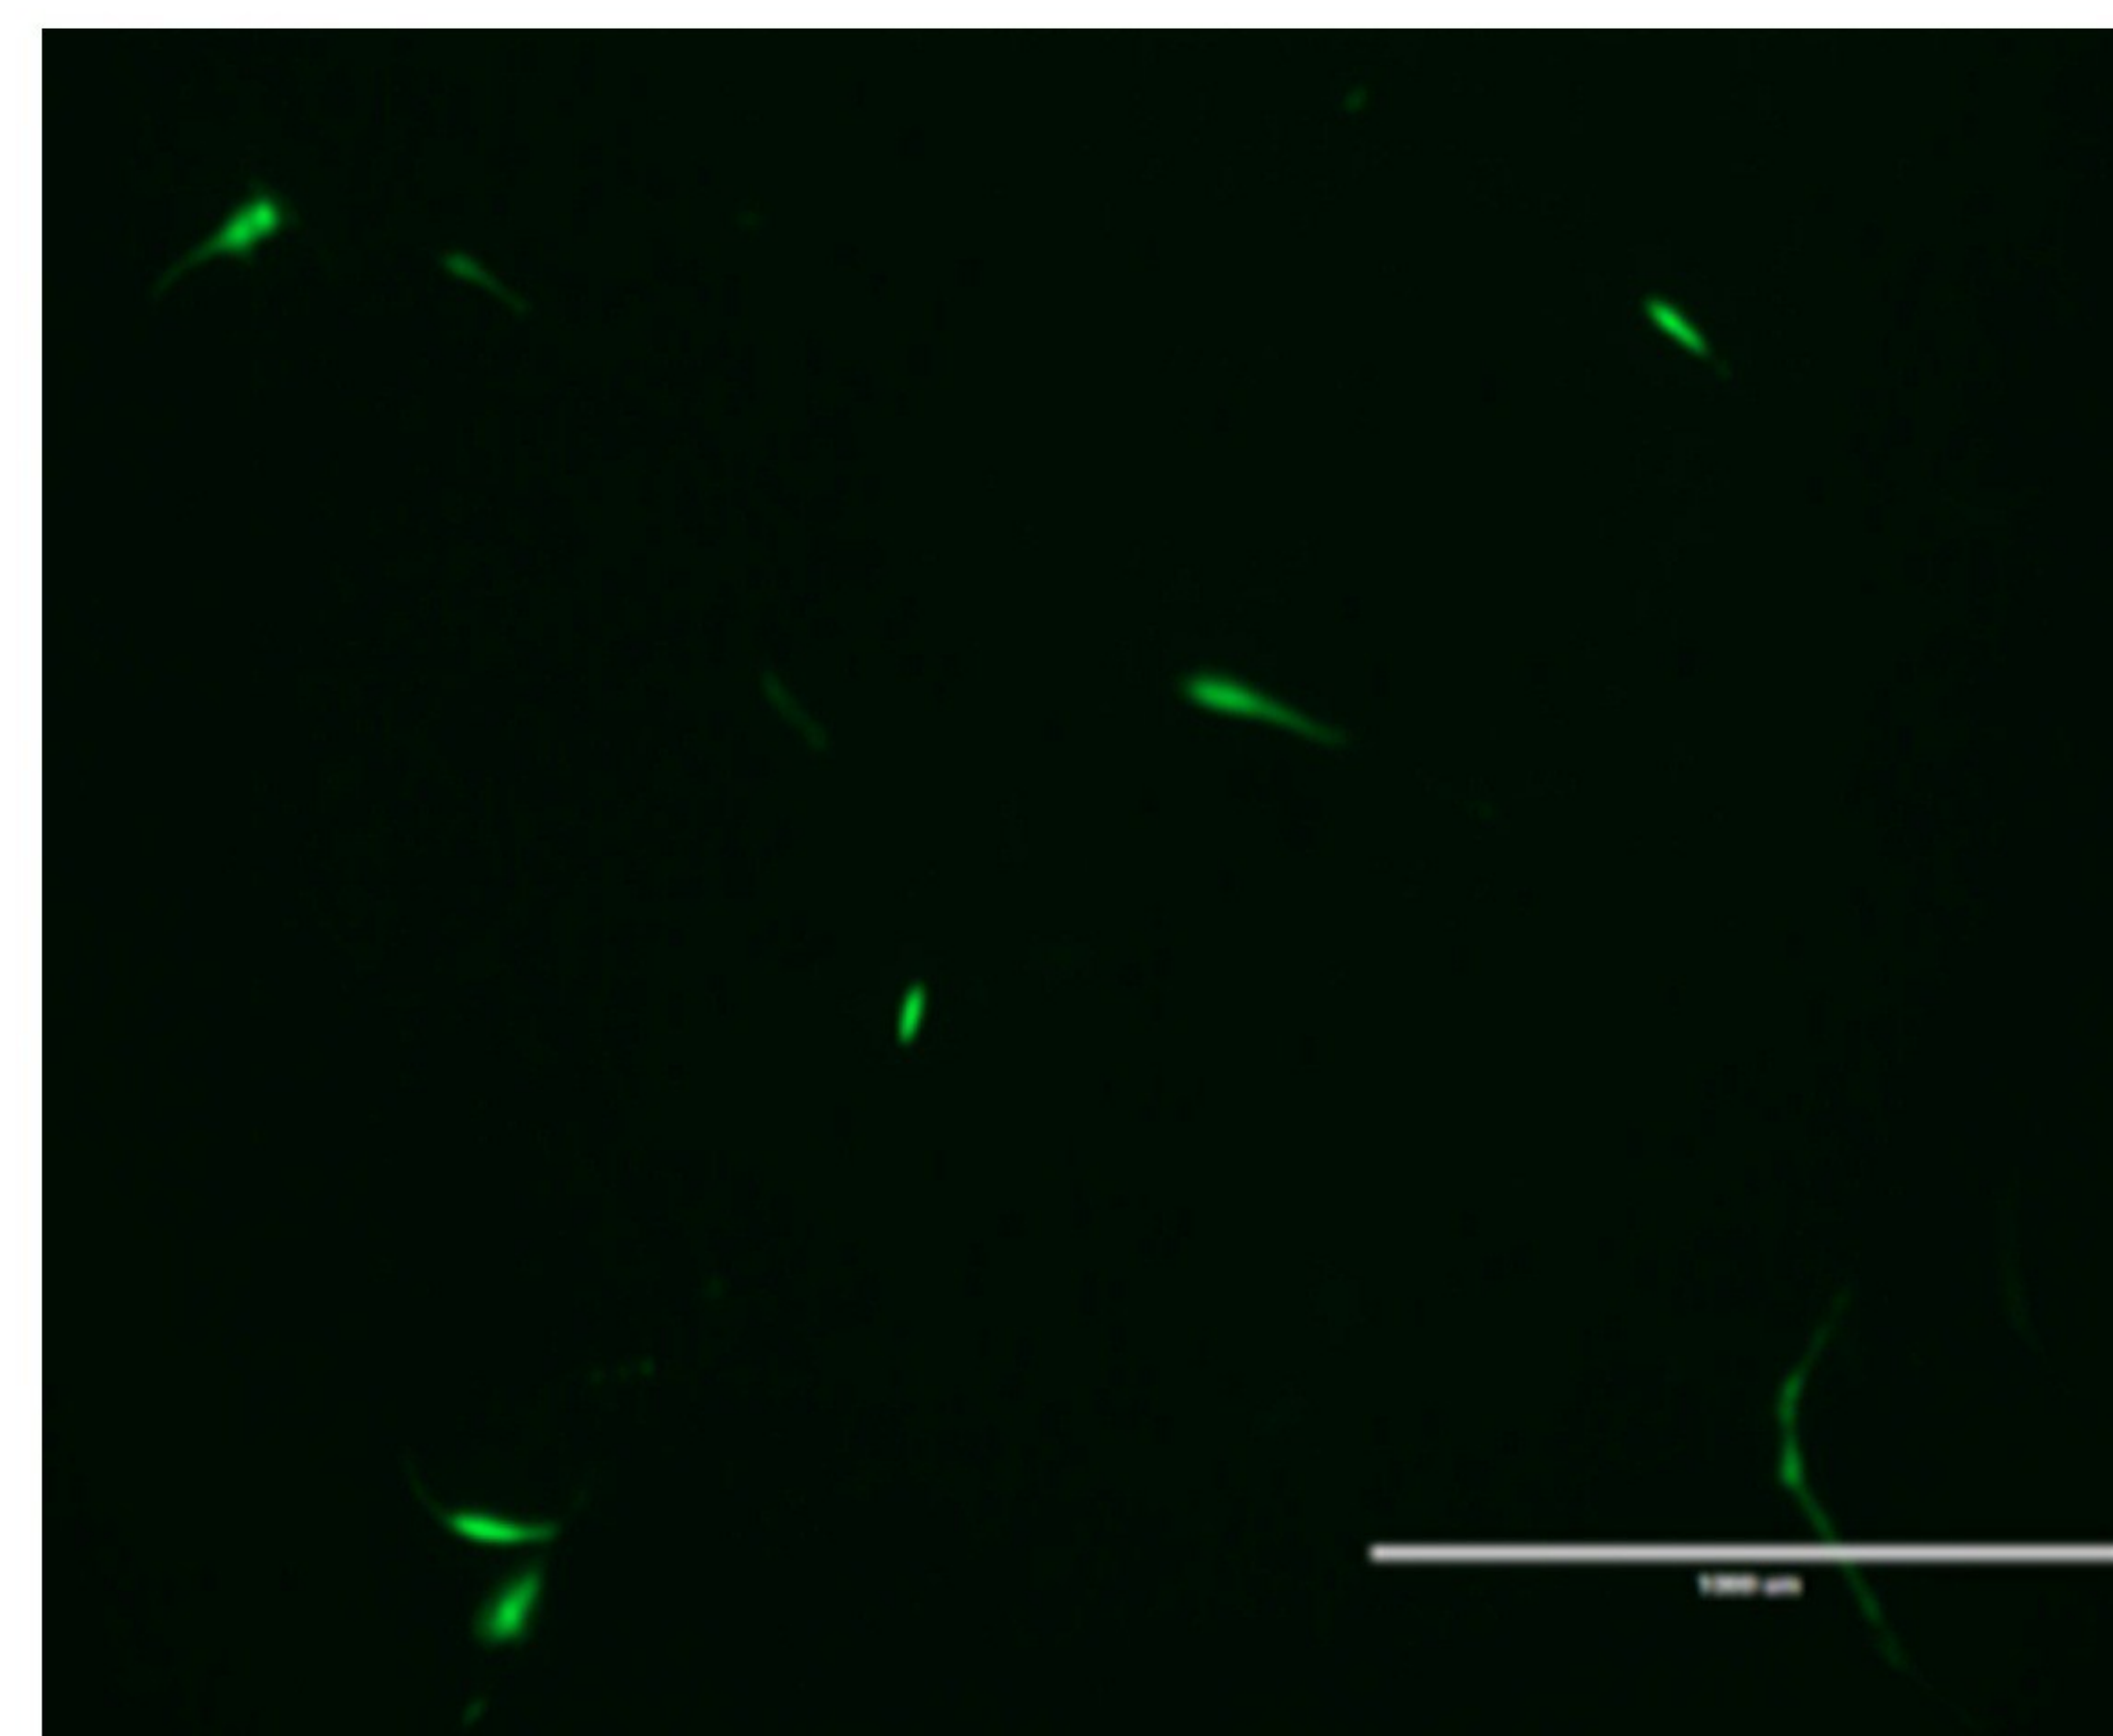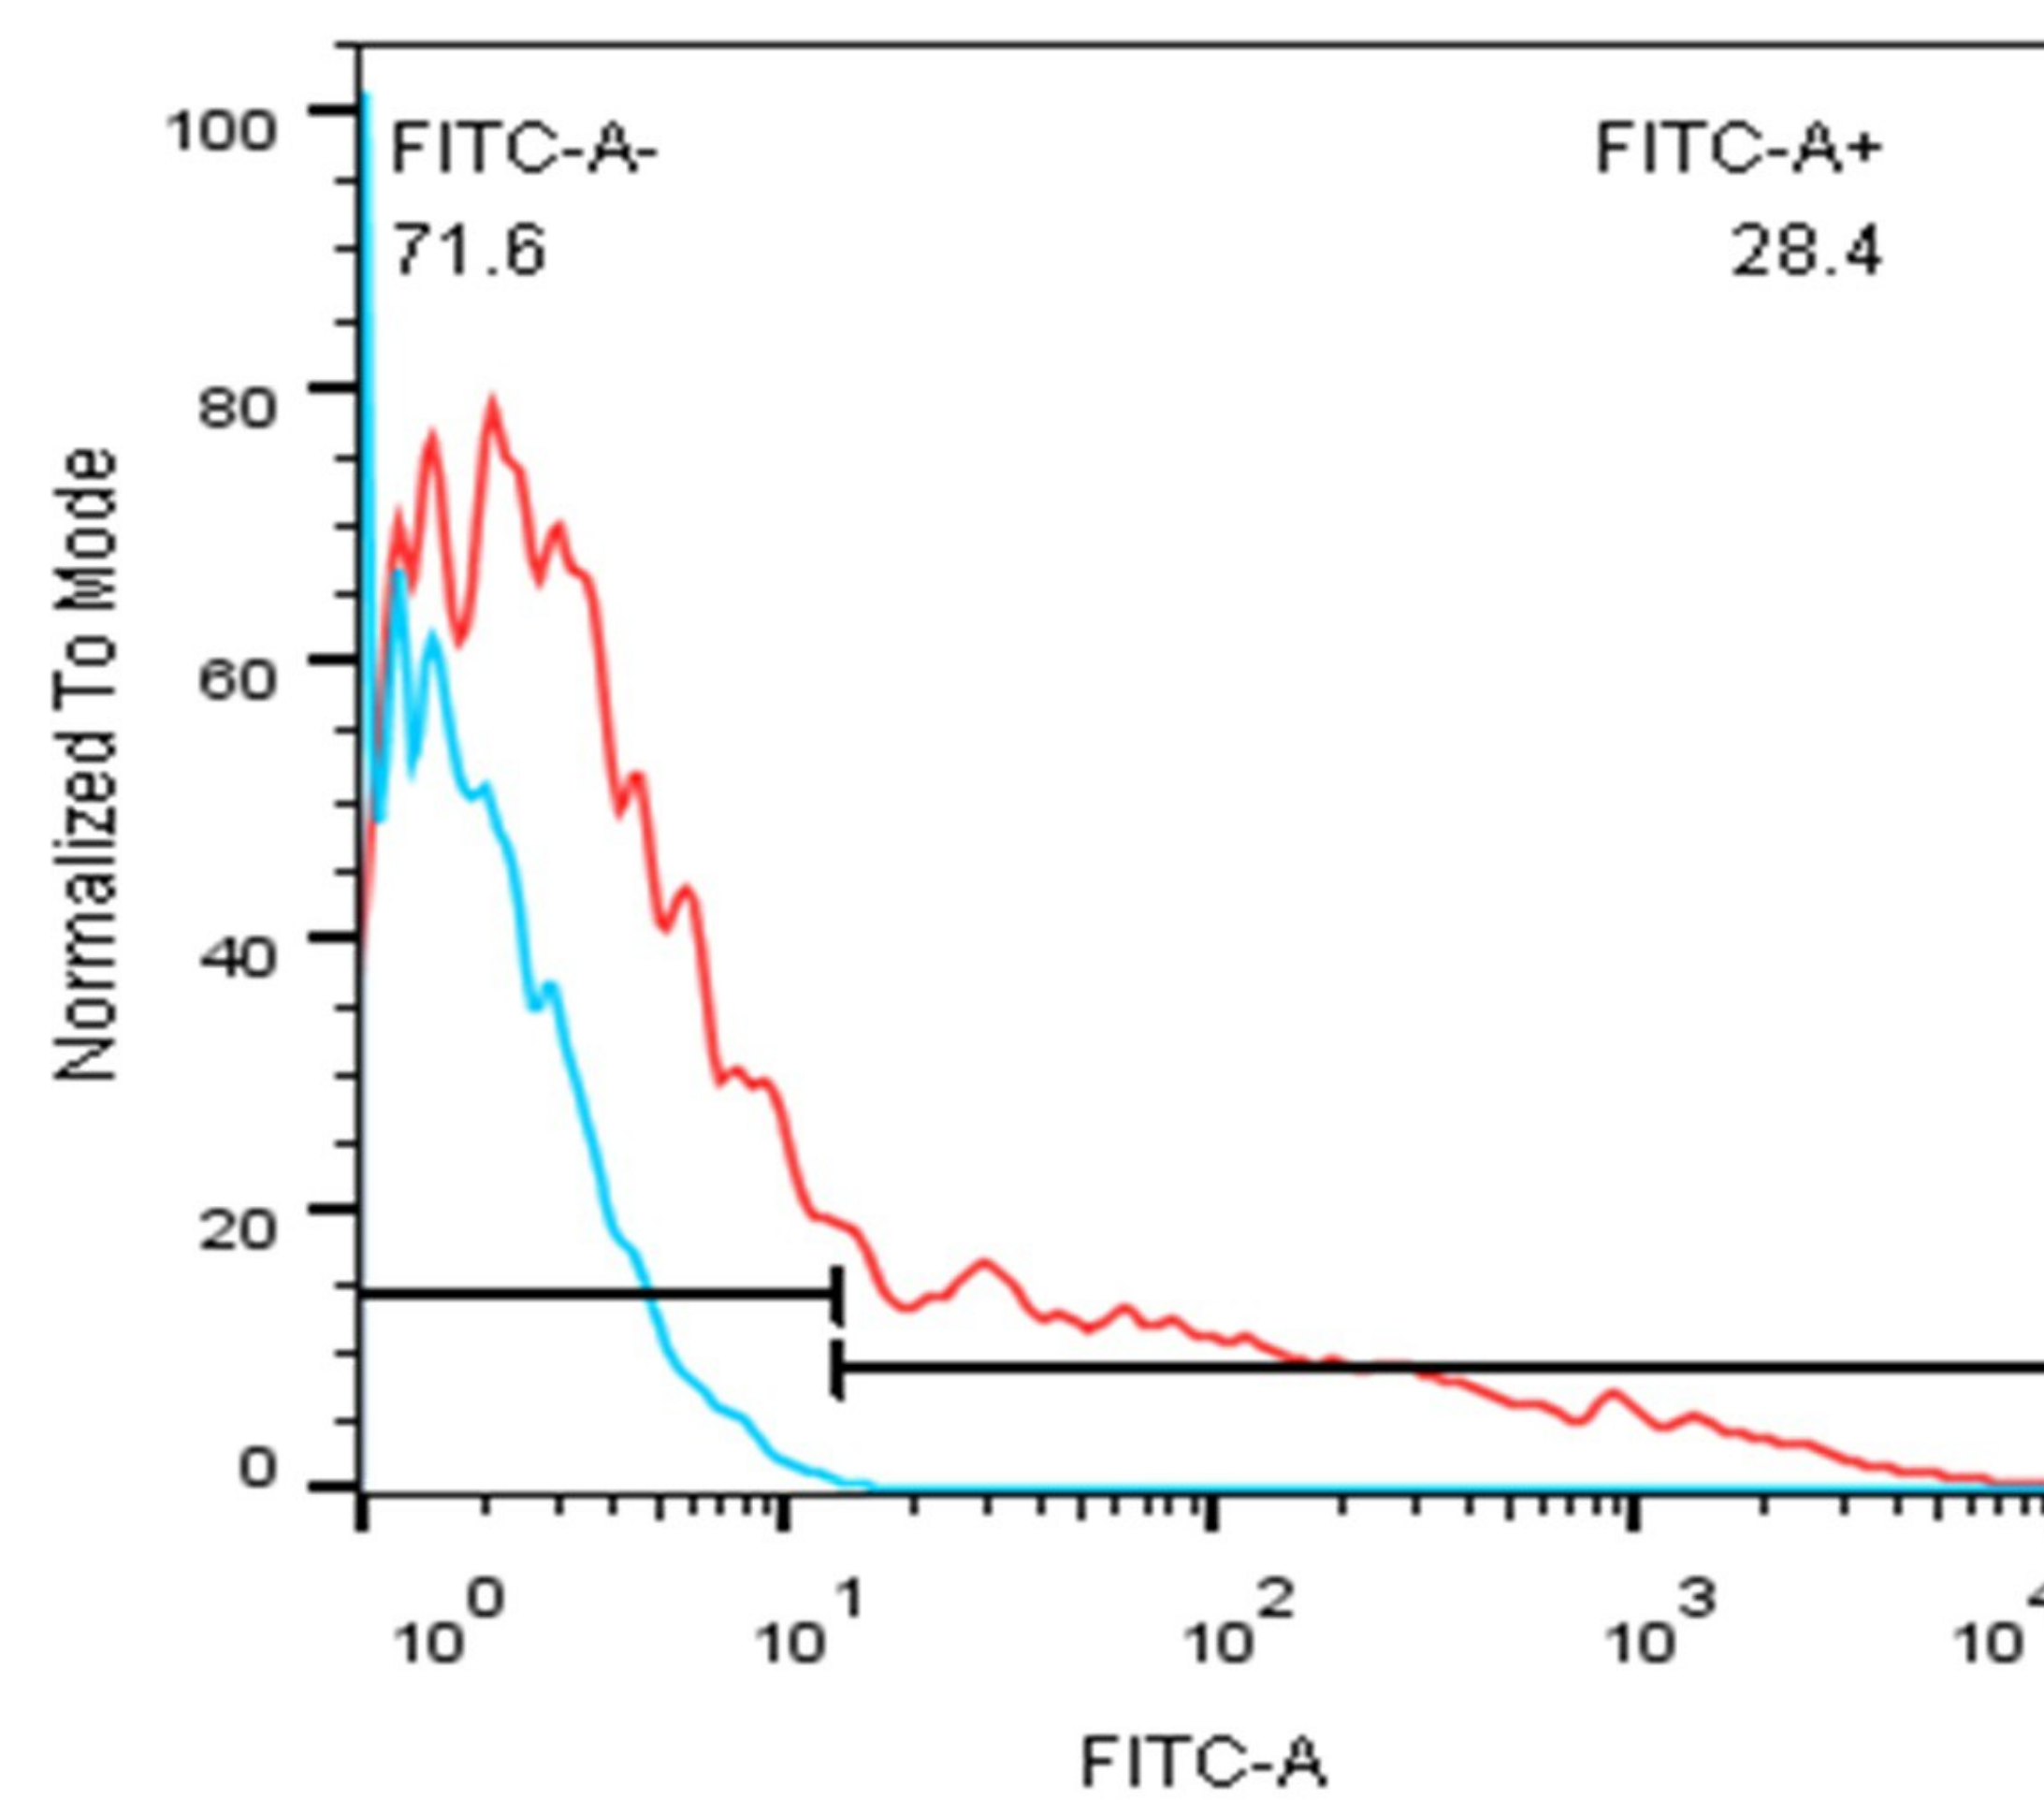

Supplement: d0bm00041h1.pdf [file d0bm00041h1.pdf]

## Supplementary Figure 2.

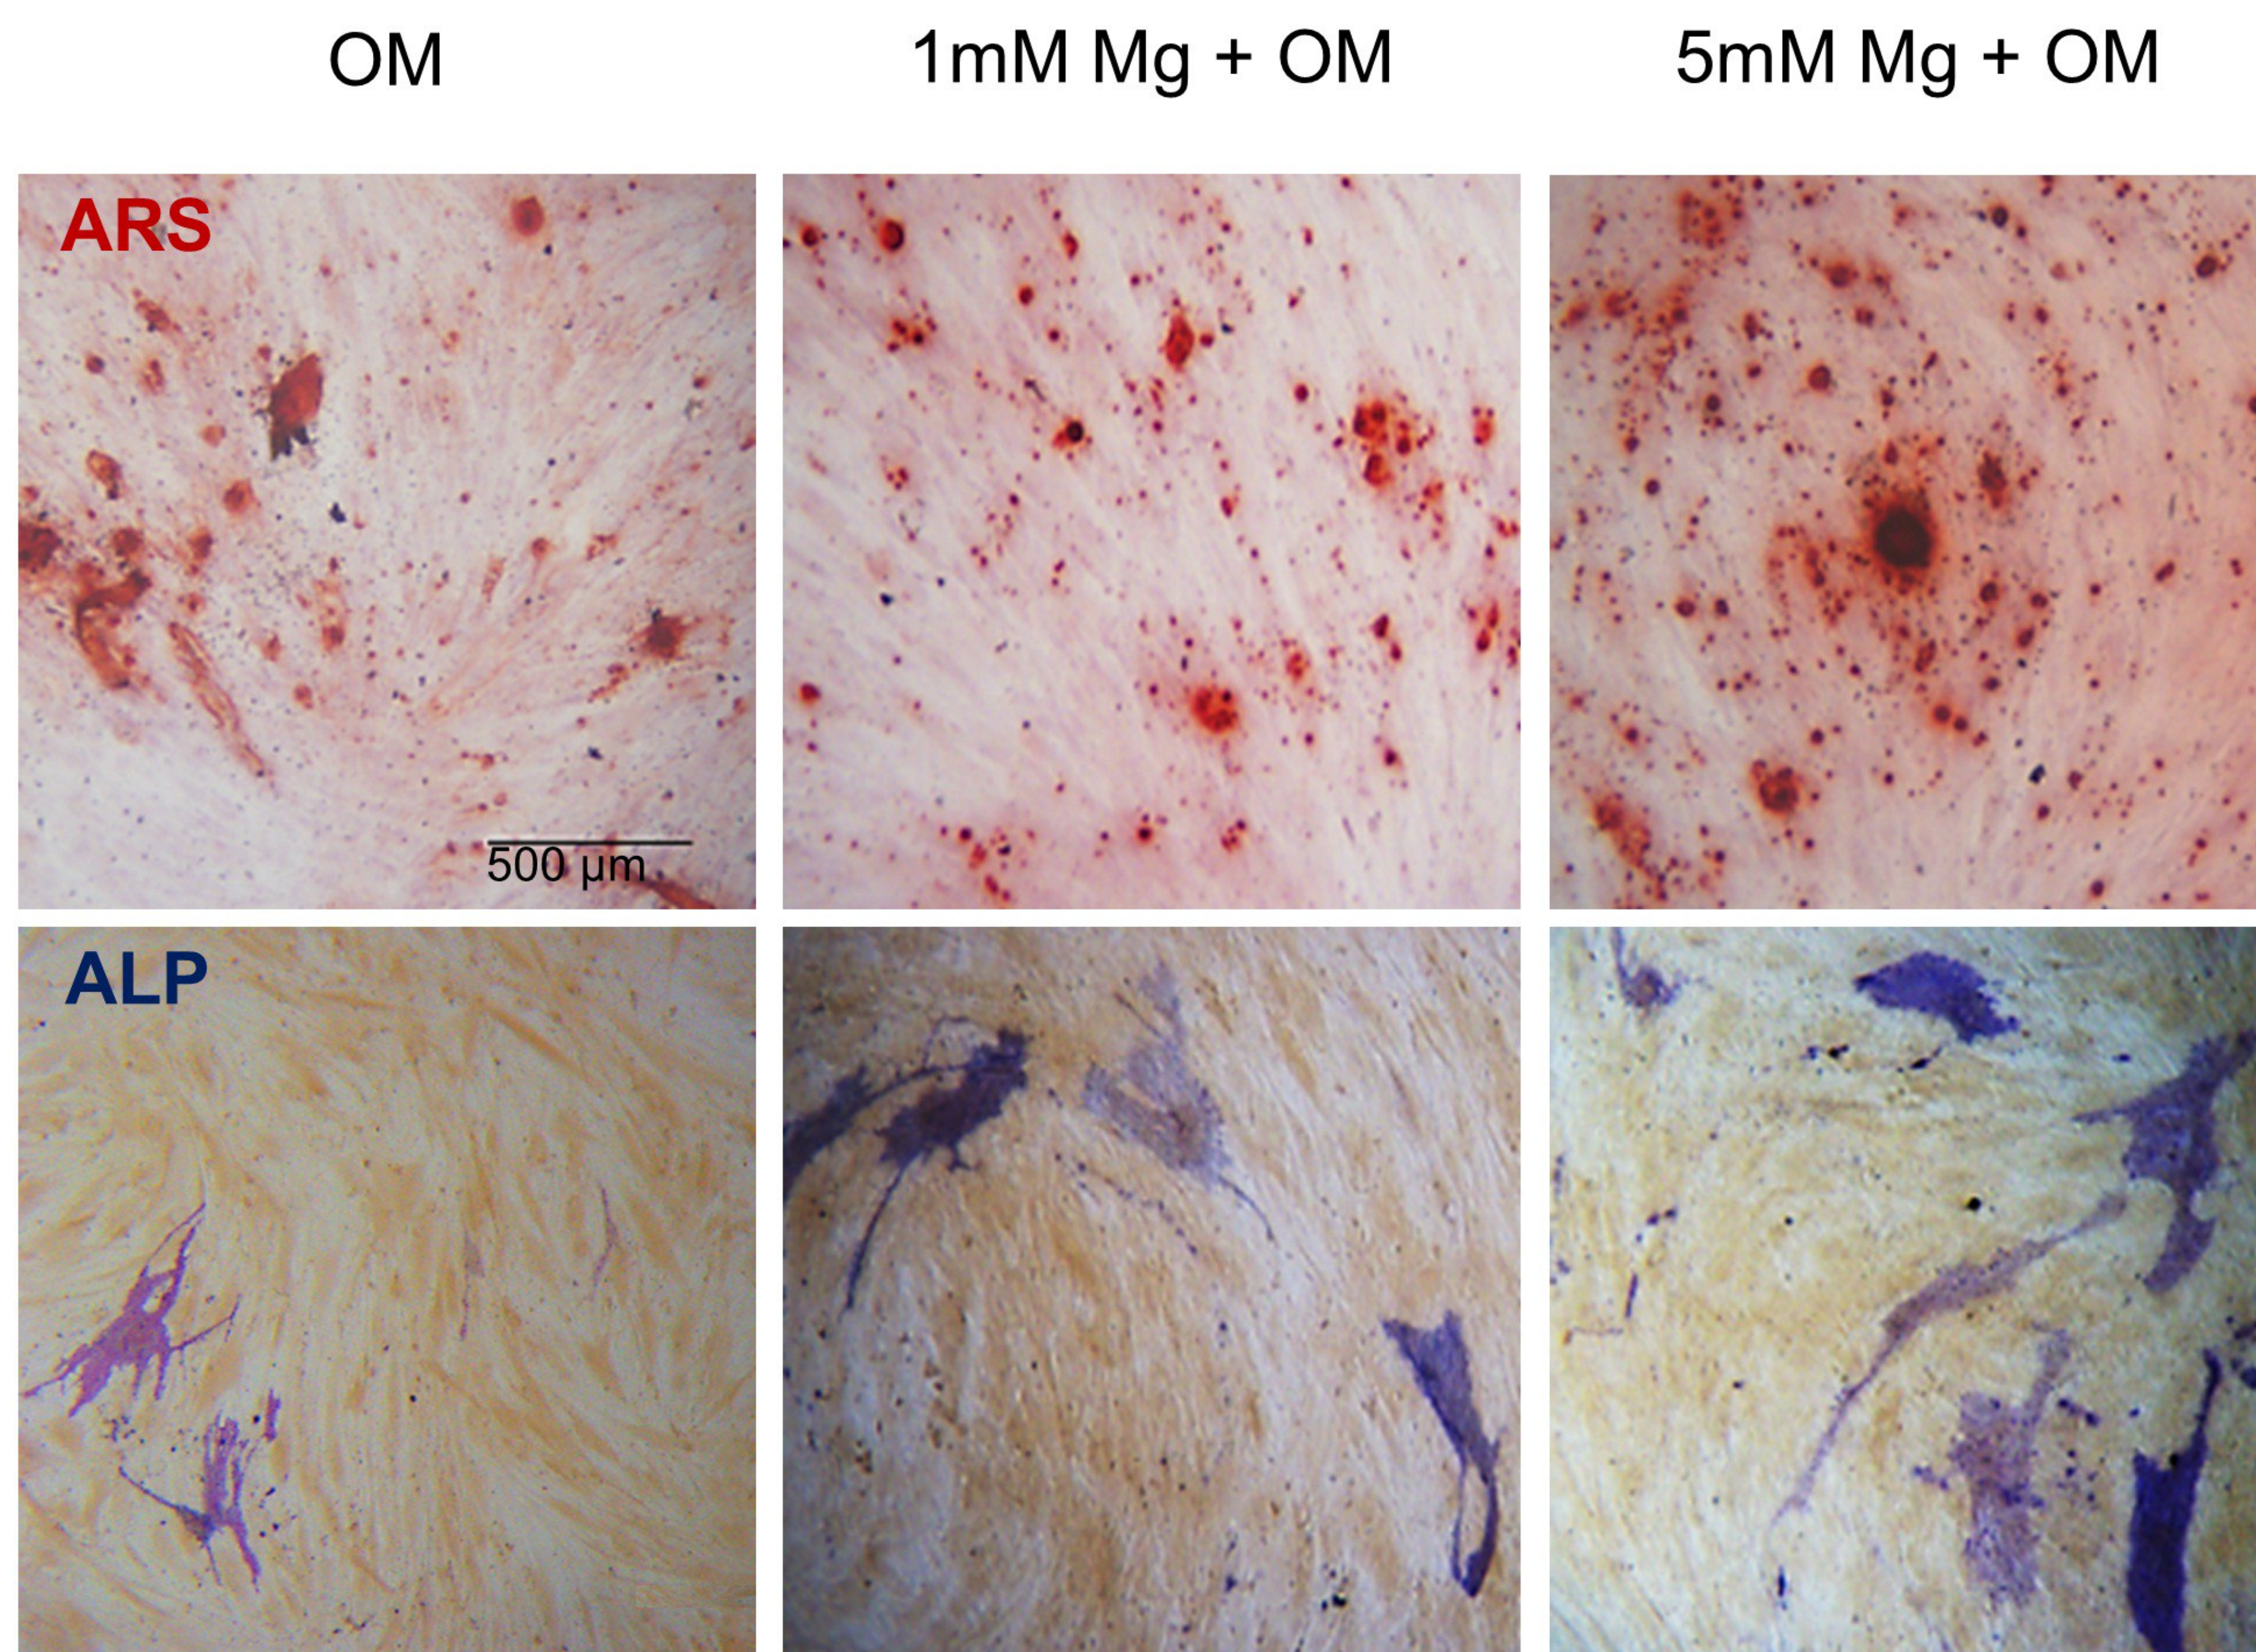

Supplement: d0bm00041h2.pdf [file d0bm00041h2.pdf]

## Supplementary Figure 3.

**a**

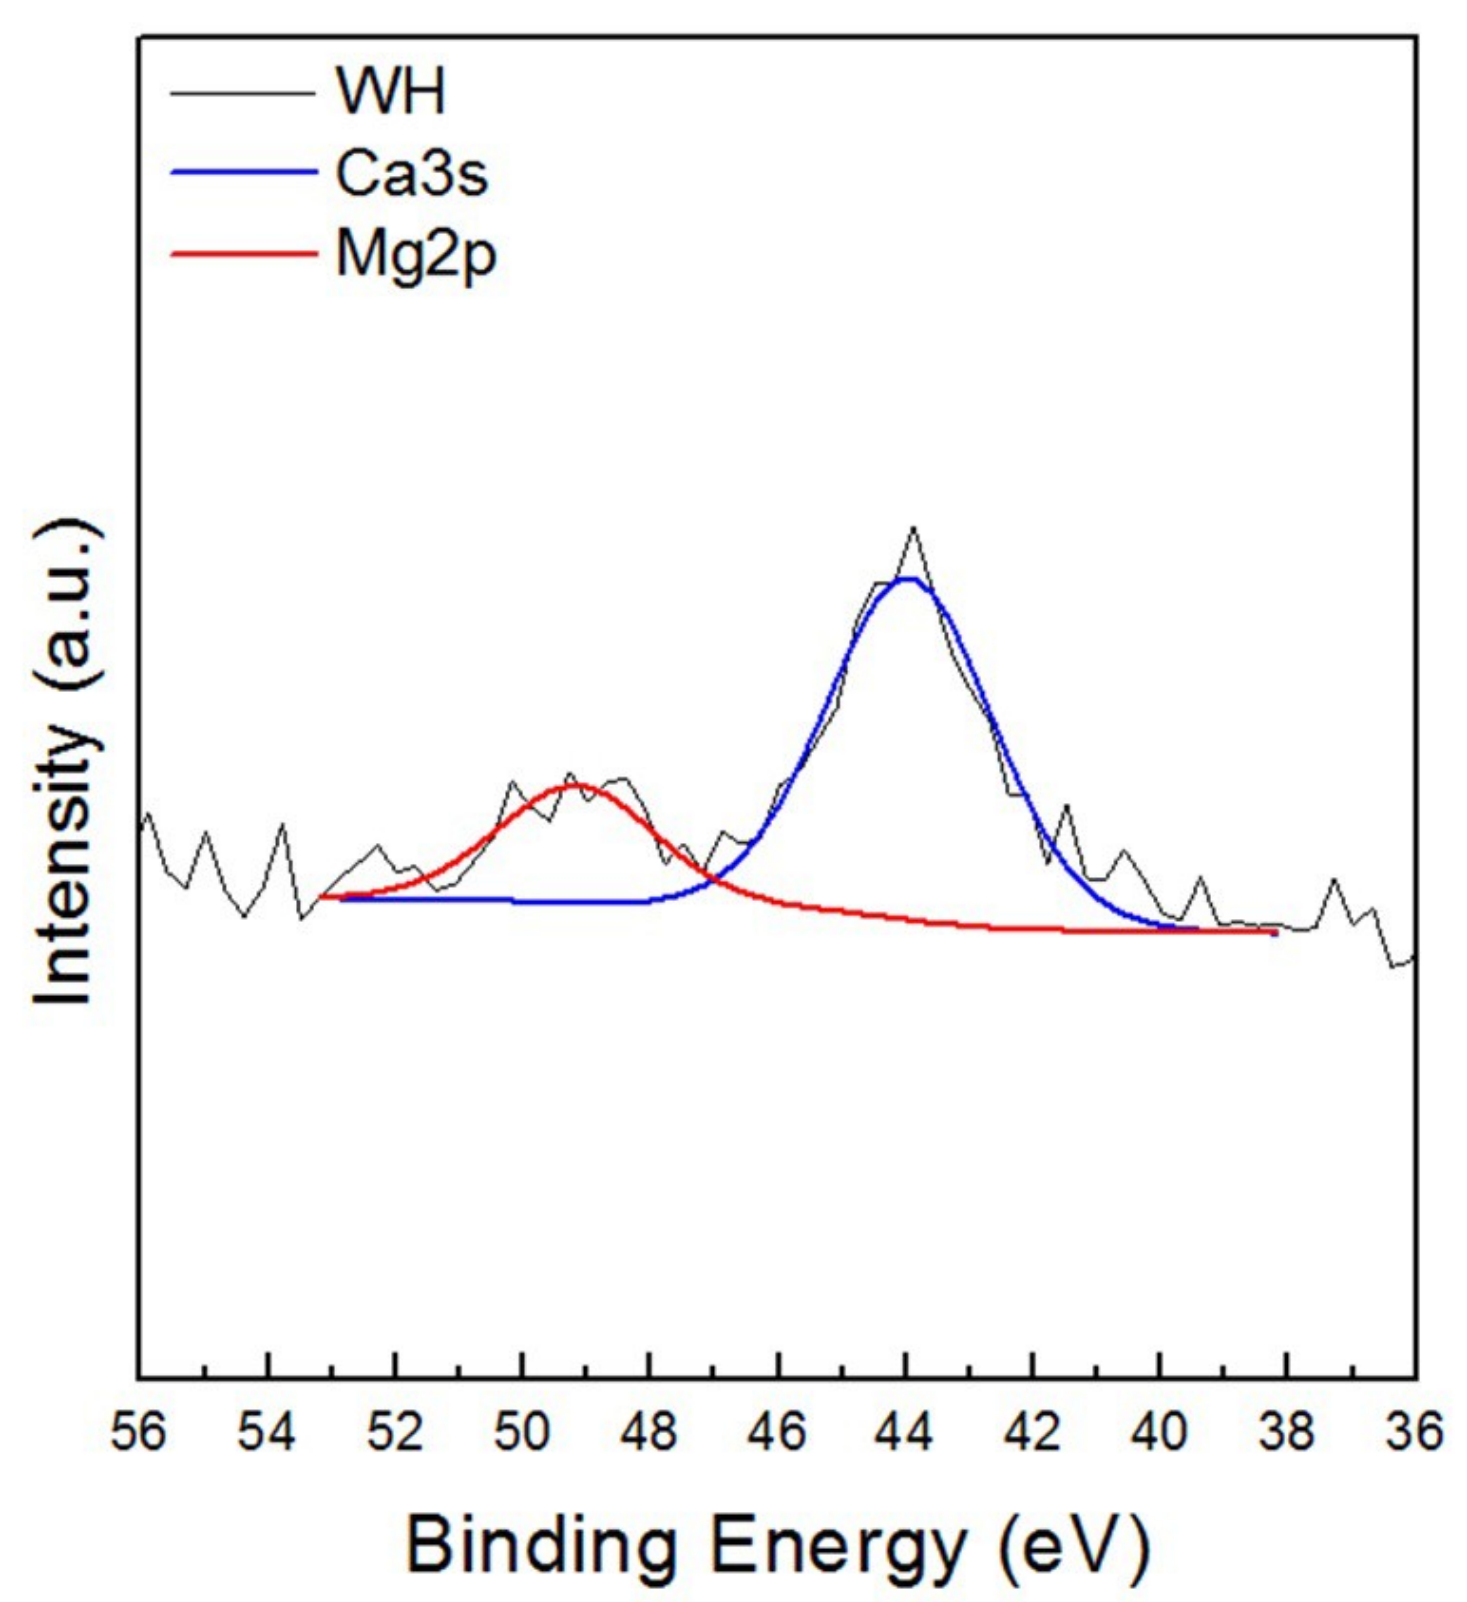

**b**

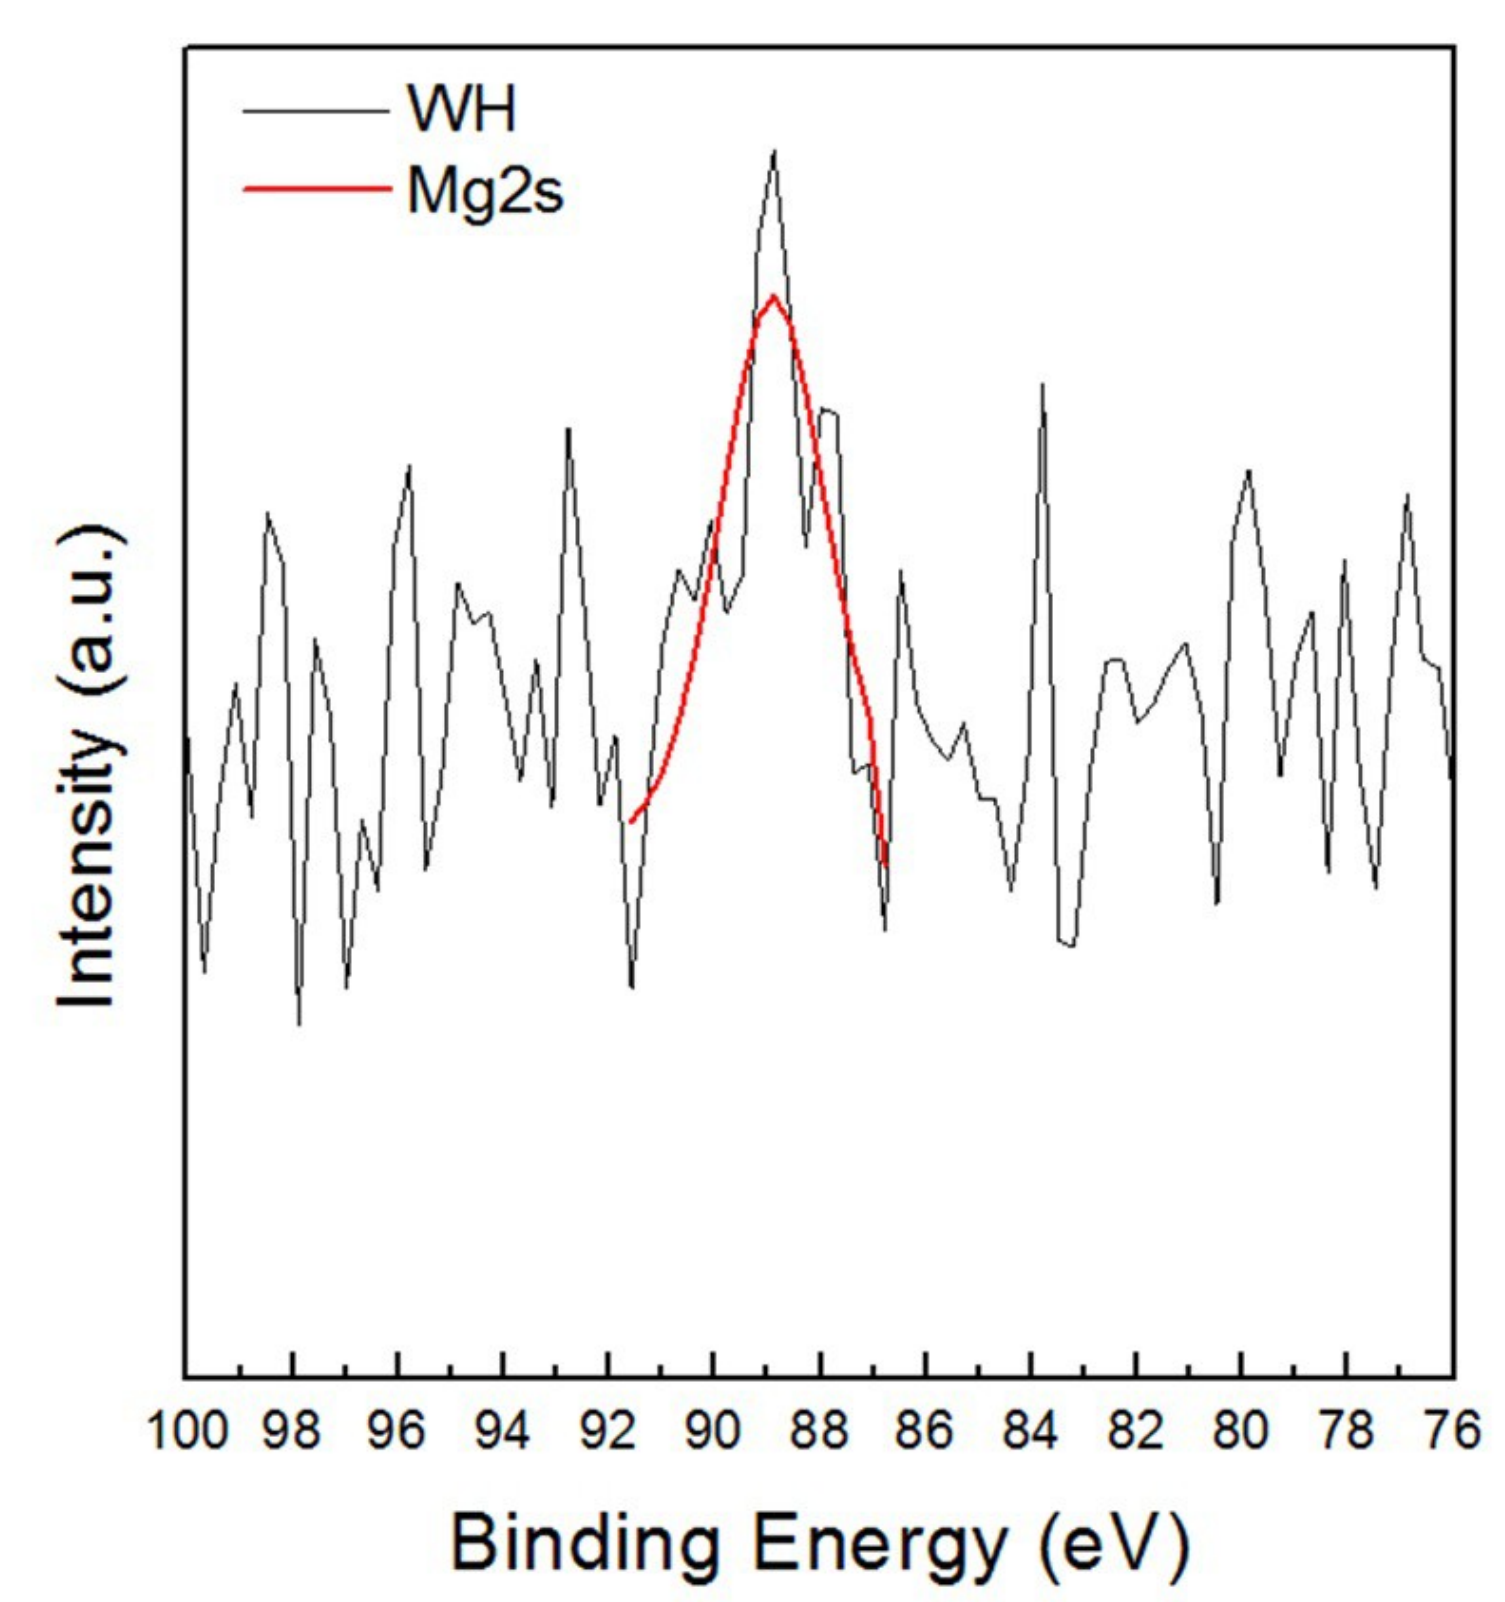

Supplement: d0bm00041h3.pdf [file d0bm00041h3.pdf]
